# Supplementary material for: Bmp Signal Gradient Modulates Convergent Cell Movement via Xarhgef3.2 during Gastrulation of Xenopus Embryos
Source: MDPI journal article supplement (doi:10.3390/cells11010044), 2021-12-24
Supplement: s1 [file s1]

## Protein sequence (FASTA) and information

>sp|Q9NR81|ARHG3\_HUMAN Rho guanine nucleotide exchange factor 3 OS=Homo sapiens OX=9606 GN=ARHGEF3 PE=1 SV=1

MVAKDYPFYLTVKRANCSLELPPASGPAKDAEEPSNKRVKPLSRVTS LANLI PPVKATPL  
KRFSQTLQRSISFRSESRPDILAPRPWSRNAAPSSTKRRDSKLWSETFDVCVNQMLTSKE  
IKRQE AIFELS QGEEDLIEDLKLAKKAYHDPMLKLSIMTEQELNQIFGTLD SLIPLHEEL  
LSQLRDVRKPDGSTEHVGPI LVGWL PCLSSYDSYCSNQVAAKALLDHKKQDHRVQDFLQR  
CLES PF SRKLDLWNFLDIPRSRLVKYPLLLREILRHTPNDNPDQQHLEEA INIIQGIVAE  
INTKTGESECRYKERYKRLLYLEEGQKDSLIDSSRVLCCHGELKNNRGVKLHVFLFQEVLVI  
TRAVTHNEQLCYQLYRQPIPVKDLLEDLQDGEVRLGGS LRGA FSNNERIKNFFRV SFKN  
GSQSQTHSLQANDTFNKQQWLNCIRQAKETVLC AAGQAGVLDSEGSFLNPTTGSRELQGE  
TKLEQMDQSDSESDCSMDTSEVSLDCERMEQTDSSCGNSRHGESNV

>sp|Q91X46|ARHG3\_MOUSE Rho guanine nucleotide exchange factor 3 OS=Mus musculus OX=10090 GN=Arhgef3 PE=1 SV=1

MVAKDYPFYLTVKRANCSLEAPLGSGVAKDEEPSNKRVKPLSRVTS LANLI PPVKTTPLK  
RFSQTLQRSISFRSESRPDILAPRAWSRNATSSSTKRRDSKLWSETFDVCVNQVLTAK EI  
KRQE AIFELS QGEEDLIEDLKLAKKAYHDPMLKLSIMTEQELNQIFGTLD SLIPLHEEL  
SQLRDVRKPDGSTEHVGPI LVGWL PCLSSYDSYCSNQVAAKALLDHKKQDHRVQDFLQRC  
LES PF SRKLDLWNFLDIPRSRLVKYPLLLREILRHTPNDNPDQQHLEEA INIIQGIVAEI  
NTKTGESECRYKERYKRLLYLEEGQKDSLIDSSRVLCCHGELKNNRGVKLHVFLFQEVLVIT  
RAVTHNEQLCYQLYRQPIPVKDLTLEDLQDGEVRLGGS LRGA FSNNERVKNFFRV SFKNG  
SQSQTHSLQANDTFNKQQWLNCIRQAKETVLSAAGQAGLLDSEGLVQGPGTENREPQGET  
KLEQMDQSDSESDCSMDTSEVSLDCERMEQTDASCANSRPEESV

>tr|Q1MT42|Q1MT42\_DANRE Rho guanine nucleotide exchange factor 3 OS=Danio rerio OX=7955 GN=arhgef3 PE=4 SV=1 (Zebrafish)

MVAKDYPIYLLIKLANCSVDESSSCGRGVGRELEEPSTKRVKPLSRVTS LASLI PPVKAA  
PLKRIGQTLQRSISFRSDCRPEIMAPRPWSRQVVPTITKRRDSKLWSETFDVGLGHMLSS  
KEIKRQE AIFELS QGEQDLIEDLKLAKKAYHDPMLKLCIMTEHELNQIFGTLD SLIPLHE  
DLLSRLRDVRNPDGSTDHMGHILVHWLPCLETYNSYCSNQVAAKALLDHKKQDHRVHDFL  
QRCLES PF SRKLDLWNFLDIPRSRLVKYPLLLREILKHTPNEHPDRQHLDEAINMIQSIV  
AGINTQTGESECRYKERYKRLLYLESGQRDLLESSRILICHGELKNNRGVKLHVFLFQDVL  
VITRAISHNEQLWYQLYRQPIPVDRLEWEDLQDGEMRVGGSIRGA FSNNERTKNFFRV MF  
RCGGQTQMHC FQASDTFNKQQWLNCIRQAKEAVGSAESEPPRSPQMDRERQHND CSDSNM  
MDTMEDSSSEYPQMELADIPVSPVRE

>sp|Q5ZLX4|ARHG3\_CHICK Rho guanine nucleotide exchange factor 3 OS=Gallus gallus OX=9031 GN=Arhgef3 PE=2 SV=1

MVAKDYPFYLTVKRANCALDVEAASSPAKETEEPSNKRVKPLSRVTS LANLI PPVRATPL  
KRFSQTLQRSISFRSDSRPDLFSPRPWSRNTPAANTKRRDSKLWSETFDVCVNHMLTSKE  
IKRQE AIFELSKGEEDLIEDLKLAKKAYHDPMLKLSIMTEQELNQIFGTLD SLIPLHEDL  
LRLRQEVKRS DGSTEHVGHILVGWL PCLNSYDSYCSNQVAAKALLDHKKQDHRVQDFLQR  
CLES PF SRKLDLWNFLDIPRSRLVKYPLLLREILRHTPNDHPDQQHLEEA INIIQGIVAE  
INIKTGESECQYKERYLIYLEGGQRDSLIDNSRVLCCHGELKNNRGVKLHVFLFQEVLVI  
TRAITHNEQLCYQLYRQPIPVMDLVLEDLQDGEVRLGGSIRGA FSNNERIKNFFRV SFKN  
GSQSQSHSLQANDSFNKQQWLNCIRQAKEKVT CAGKAGVLSSEACFILSPNGSRVSQGET  
MIEQMDQSDSESDCSMDTSEISIDCERMEQTNPCENEKQIETNV

>tr|Q32NJ3|Q32NJ3\_XENLA Rho guanine nucleotide exchange factor 3 OS=Xenopus laevis OX=8355 GN=arhgef3.2.L PE=2 SV=1

MVAKDYPFYLTVKRNVNLTLEVKTTRNPTKEIEEPSTKRVKPLSRVTS LANLI PPAKPTPL  
KRFSQSLQRSISFRSDSRPDLFTPRPWSRNAPPPITKRRDSKLWSETFDVCVNQVLT SQE  
IKRQEVIFELS QGEEDLIEDLKLAKKAYHDPMLKLSIMTEQELTQIFGTLD SLIPLHEDL  
LRLRLEVVRKPDGSTENVGHILVGWL PCLNSYDSYCSNQVAAKALLDHKKQDHRVQDFLQR

CLESPFSRKLDLWNFLDIPRSRLVKYHLLLKELLRHTPNNGHQDQQHLEEA INIVQGIVAE  
INIKTGESECHYYKERLIYLDECQKDPLIDNSRALCCHGELKNNRGAKFHVFLFQDVLMI  
TRTITQNEALYYQVYRQPIPVKDLILDDLQDGEVRLAGSLRGAFSNNERIKNFFRVGFKN  
GSHSQAHFLQANDTFNKQQWLNLCIRQAKESVVCSSGGDDASSNRRLSISANGTCGSQPPA  
RFEKMDQSDSVSDCSMDISETSMDCEQMEQTNSHNKEEVESNV

>tr|F7CBC5|F7CBC5\_XENTR Rho guanine nucleotide exchange factor (GEF) 3, gene  
1 OS=Xenopus tropicalis OX=8364 GN=asb13 PE=4 SV=4  
MATGGSIVRGVTAPRGCAMDESEGPEEKEETESWYGGQGQLGEELTPFWGRLVWGTGLKR  
RKQVEPPPGQVAEEKEPSSKRVPVSKTLSASVAPPPAKVTPLKKLSLSIQKSIGCKSES  
RLFSFPPTRSREPGGAKRRSSKLWRETFDSSAGEELSAREIKRQEVIFELMQGEHTLIE  
DLNLVRKNYYEPMLKLEILSREELEQIFGILDSLAPLHQDLLERLLKLRRREDGTLEVIGP  
TMLDWLPCLHAYKTYCCNQVAAKSLLDHKRRCAAVQNFLRLCQESAFSRKLDVWSFLDLP  
RSRLVKYPLLLKELLKHTGPEHPDYTPLGEAVCMITIVSLINSKTGEAECEYYRRRLTY  
LYESQEEGAVTSSRLLHCHGELKNNKGQRLQVFLFEAALVLRPITQNHQLQFQVYRQPI  
PLQELVLEDLPDGEVRVGGSIIRGAFTPATERAKNFFRVSFQDRSRGQSHTLQANDSFNKQ  
QWVSCIRQAKAANQGGPPEPPCTLVDISDLSLSSIEDCEKMEDG

>tr|A0A670I4W0|A0A670I4W0\_PODMU Rho guanine nucleotide exchange factor 3  
OS=Podarcis muralis OX=64176 GN=ARHGEF3 PE=4 SV=1 (common wall lizard)  
MGWCCFFVHHQKKRQSAQSEDVISVCSFDSNEPSNKRVRPLSRVTSLASLIPPVRATPL  
KRFGQTLQRSISFRSDSRPDLLASRPWTRNVPPASTKRRDSKLWSETFDVCVNQMLTSKE  
IKRQEAI FELSQGEEDLIEDLKLAKKAYHDPMLKLSIMSEQELNQIFGTLD SLIPLHEDL  
LRRLKEIRKPDGSTDCVGHILVGWLPCLNSYDSYCSNQVAAKTLLDQKKQDHRVQDFLQR  
CLESPFSRKLDLWNFLDIPRSRLVKYPLLLREILRHTPNDHPDQQHIEEA INIVQGIVAE  
INKKTGESECCYYKERLIYLDEGQKDSLIDDSRVVCCCHGELKNNRGAKLHVFLFQEV LVI  
TRAVTQNEQLCYQLYRQPIPVKDLVLEDLQDGEVRLGGSIRGAFSNNERIKNFFRVSF RK  
GSQSQSHSLQANDTFNKQQWLNLCIRQAKESVSCASSEIRTLDSEDPLLTSSSTSSSRNRI  
PRQESKLEQMDQSDSGSDCSMDISEISIDCDHMEQTYPWQTDKEIESNV

>tr|A0A5F4CCC6|A0A5F4CCC6\_CANLF Rho guanine nucleotide exchange factor 3  
OS=Canis lupus familiaris OX=9615 GN=ARHGEF3 PE=4 SV=1 (Dog)  
MVAKDYPFYLTIVKRANCSLDVPPSSSPAKDLEEPSNKRVKPLSRVTS LANLIPPVKATPL  
KRFSQTLQRSISFRSESRPDILAPRPWSRNAAPSSTKRRDSKLWSETFDVCVNQMLPSKE  
IKRQEAI FELSQGEEDLIEDLKLAKKAYHDPMLKLSIMTEQELNQIFGTLD SLIPLHEEL  
LSQLRDARKPDGSTEHVGPILVGWLPCLSSYDSYCSNQVAAKALLDHKKQDHRVQDFLQR  
CLESPFSRKLDLWNFLDIPRSRLVKYPLLLREILRHTPNDNPDQQHLEEA INIIQGIVAE  
INTKTGESECCRYYKERLLYLEEGQKDSLIDNSRVLCCHGELKNNRGVKLHVFLFQEV LVI  
TRAVTHNEQLCYQLYRQPIPVKDLLEDLQDGEVRLGGSIRGAFSNNERIKNFFRVSFKN  
GSQSQTHSLQANDTFNKQQWLNLCIRQAKETVLC AAGQAGDL DSEGPF LN PATGSREPQGE  
TKLEQMDQSDSESDCSMDTSEVSLDYERMEQT DSSCGNSRHVESNV
